# Supplementary material
Source: Springer Nature journal article supplement (https://www.springermedizin.de/resource/supplementary/12885_2013_4157_MOESM4_ESM.pdf/9465612)

**A**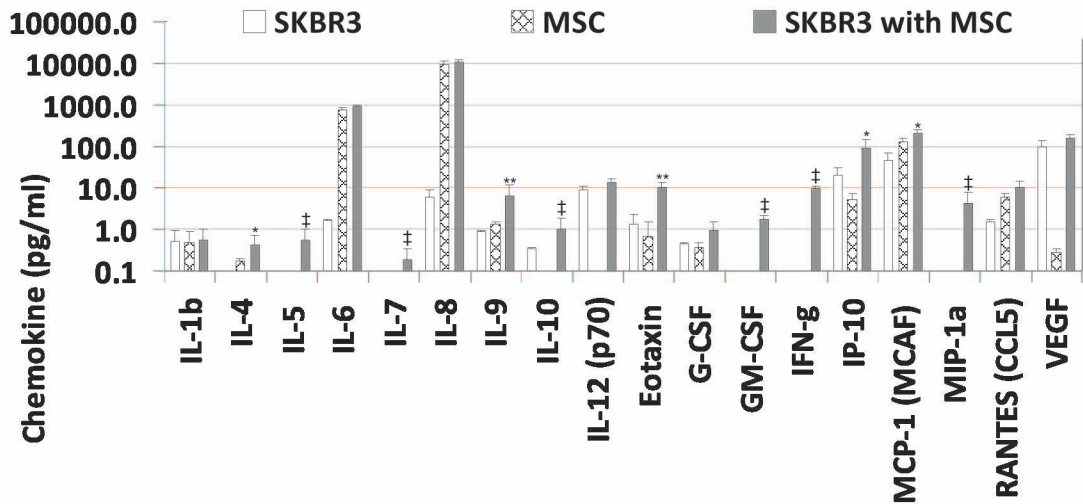**B**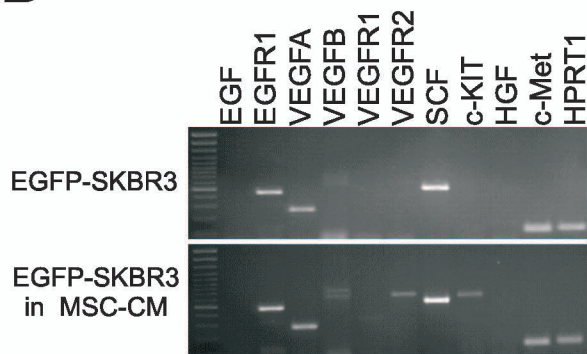**C**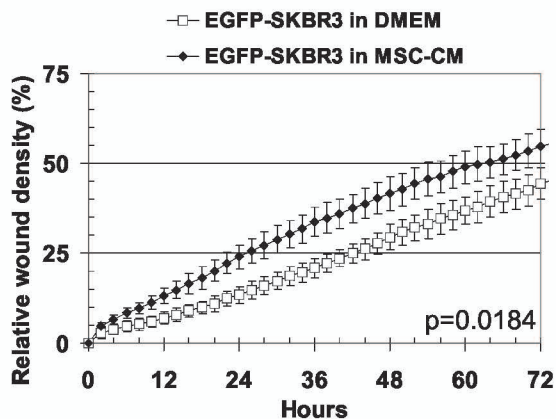**D**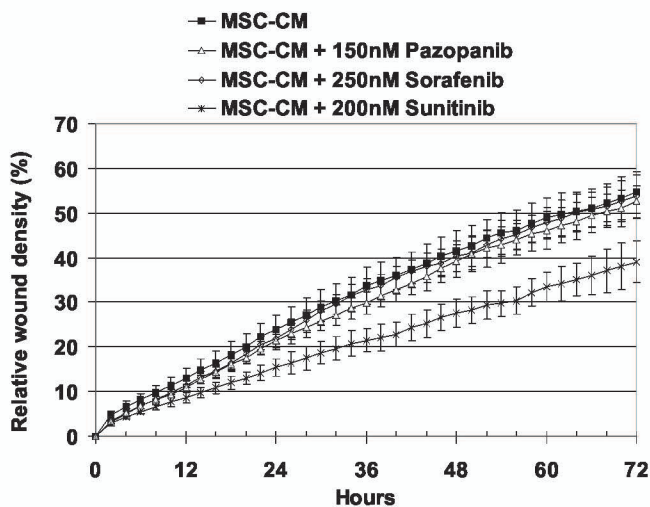

MSC-CM vs. CM+Pazopanib p=0.5267  
 MSC-CM vs. CM+Sorafenib p=0.7607  
 MSC-CM vs. CM+Sunitinib p=0.0016

Supplement: MOESM4 [file 9465612]
